# Supplementary material for: Photocatalytic reduction of mono, di, and tri-nitrophenols over a Bi2MoO6/carbon nitride heterojunction
Source: Royal Society of Chemistry journal article supplement (doi:10.1039/d3nj03243d), 2023-01-01
Supplement: d3nj03243d1.pdf [file d3nj03243d1.pdf]

**Photocatalytic reduction of mono, di, and tri-nitrophenols over  
 $\text{Bi}_2\text{MoO}_6$ /Carbon Nitride Heterojunction**

Phyu Phyu Cho,<sup>a</sup> Phyu Phyu Mon,<sup>a</sup> Devthade Vidyasagar,<sup>a</sup> Giridhar Madras,<sup>b</sup> Ch. Subrahmanyam<sup>a,\*</sup>

<sup>a</sup> Department of Chemistry, Indian Institute of Technology Hyderabad, Kandi, Sangareddy, 502285, Telangana, India.

<sup>b</sup> Department of Chemical Engineering, Indian Institute of Technology Hyderabad, Kandi, Sangareddy, 502285, Telangana, India.

\* Corresponding author

Email: [csubbu@iith.ac.in](mailto:csubbu@iith.ac.in)

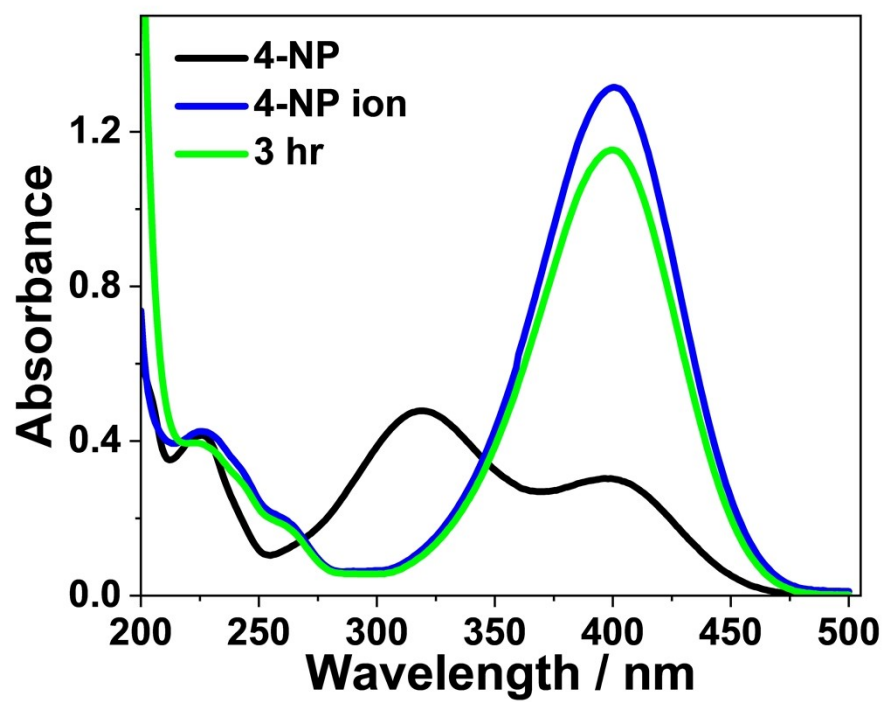

**Figure S1.** UV-visible absorption spectra of 4-NP in the presence and absence of NaBH<sub>4</sub>.

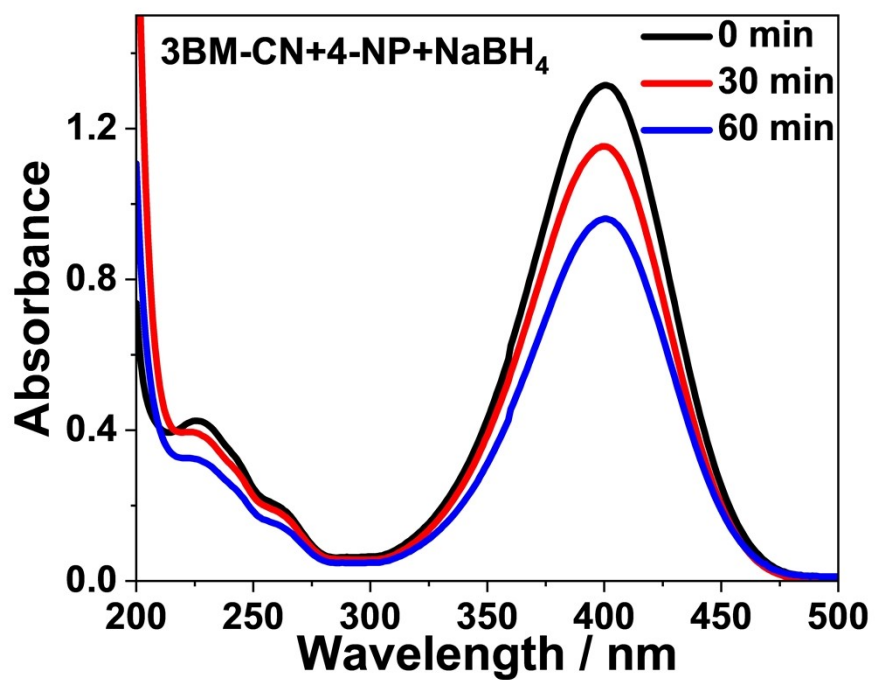

**Figure S2.** UV–visible absorption spectra of 4-NP with NaBH<sub>4</sub> in using 3BM-PCN catalyst.

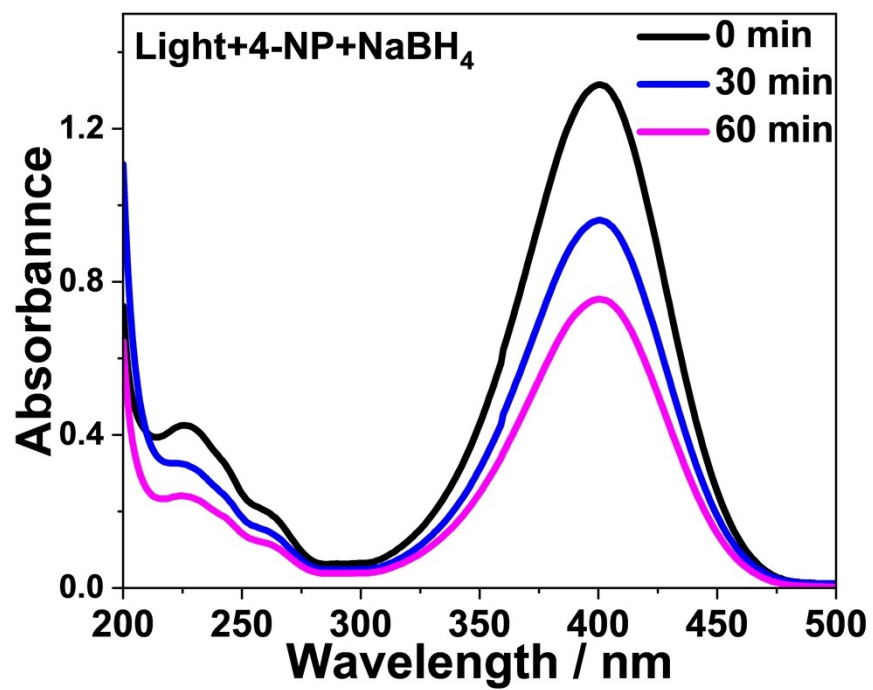

**Figure S3.** UV-visible absorption spectra of 4-NP with NaBH<sub>4</sub> under irradiation light.

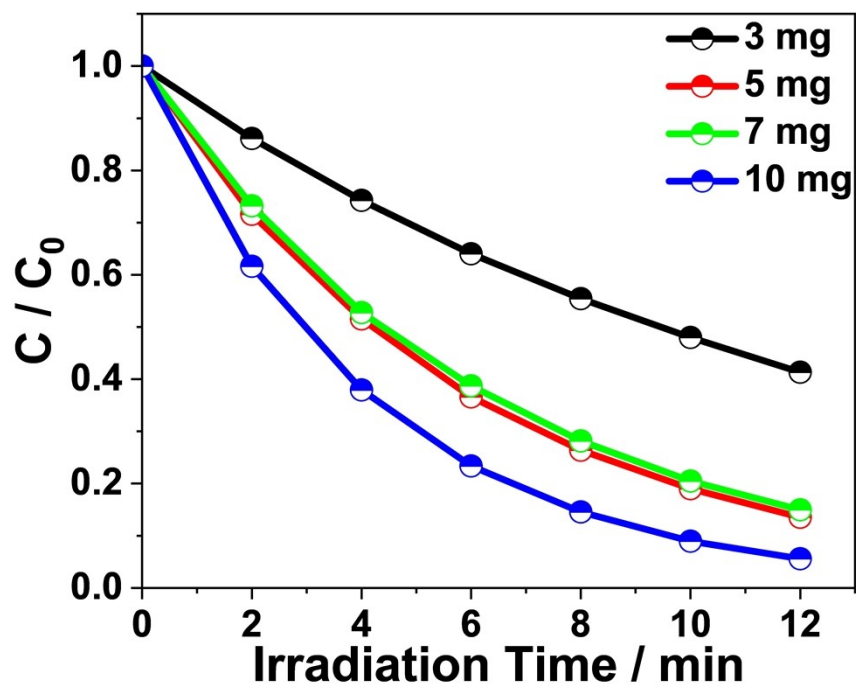

**Figure S4.** Plot of  $C/C_0$  Vs reaction time of 4-NP in the various catalyst concentration. Reaction condition: catalyst (3BM-PCN); 50 mL of 4-NP (2 mM); 1 mL of  $\text{NaBH}_4$  (20 mM).

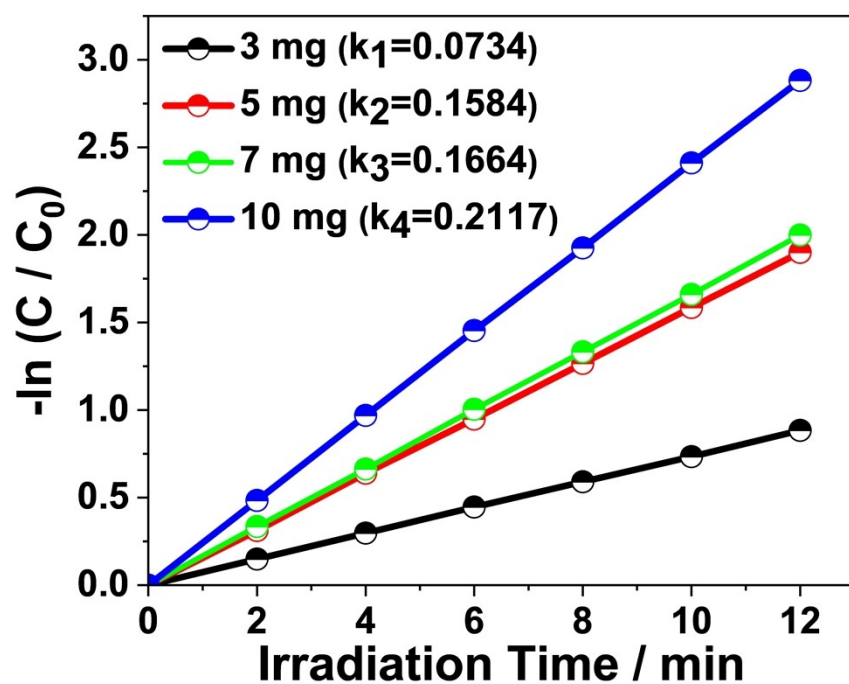

**Figure S5.** Pseudo first order kinetic plot for the photoreduction of 4-NP in the various catalyst concentration. Reaction condition: catalyst (3BM-PCN); 50 mL of 4-NP (2 mM); 1 mL of  $\text{NaBH}_4$  (20 mM).

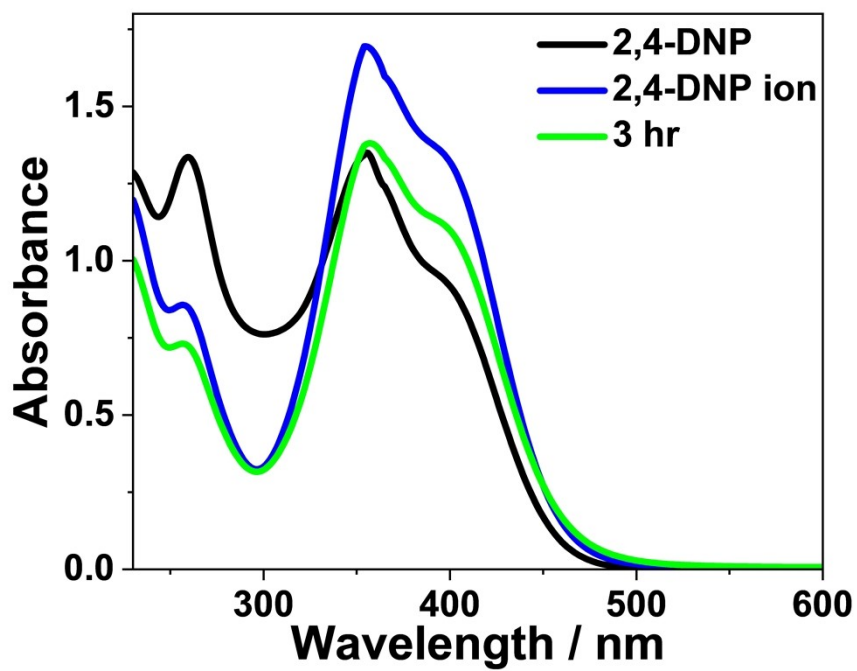

**Figure S6.** UV–visible absorption spectra in the presence and absence of  $\text{NaBH}_4$  of the 2,4-DNP. Reaction condition: 10 mg of catalyst; 50 mL of 2,4-DNP (2 mM); 1 mL of  $\text{NaBH}_4$  (20 mM).

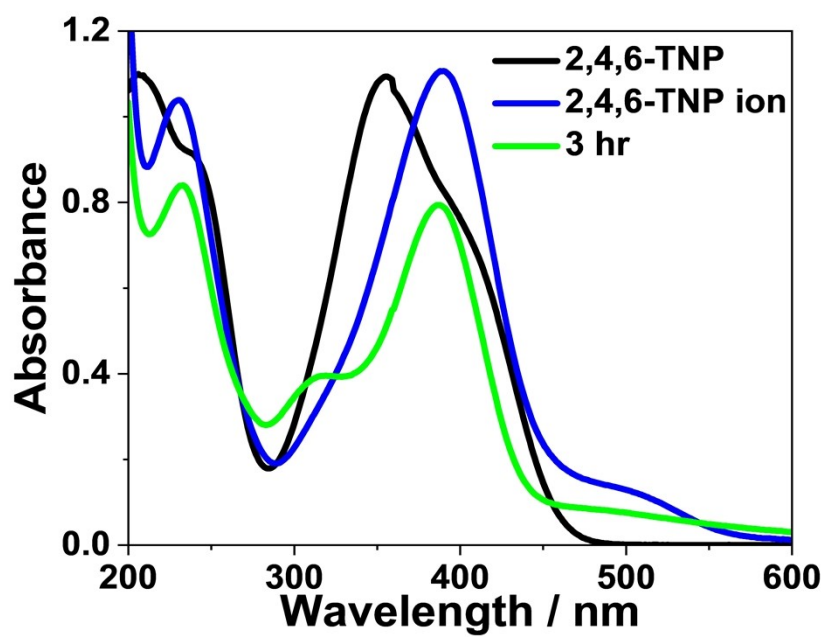

**Figure S7.** UV–visible absorption spectra in the presence and absence of  $\text{NaBH}_4$  of the 2,4,6-TNP. Reaction condition: 10 mg of catalyst; 50 mL of 2,4,6-TNP (2 mM); 1 mL of  $\text{NaBH}_4$  (20 mM).



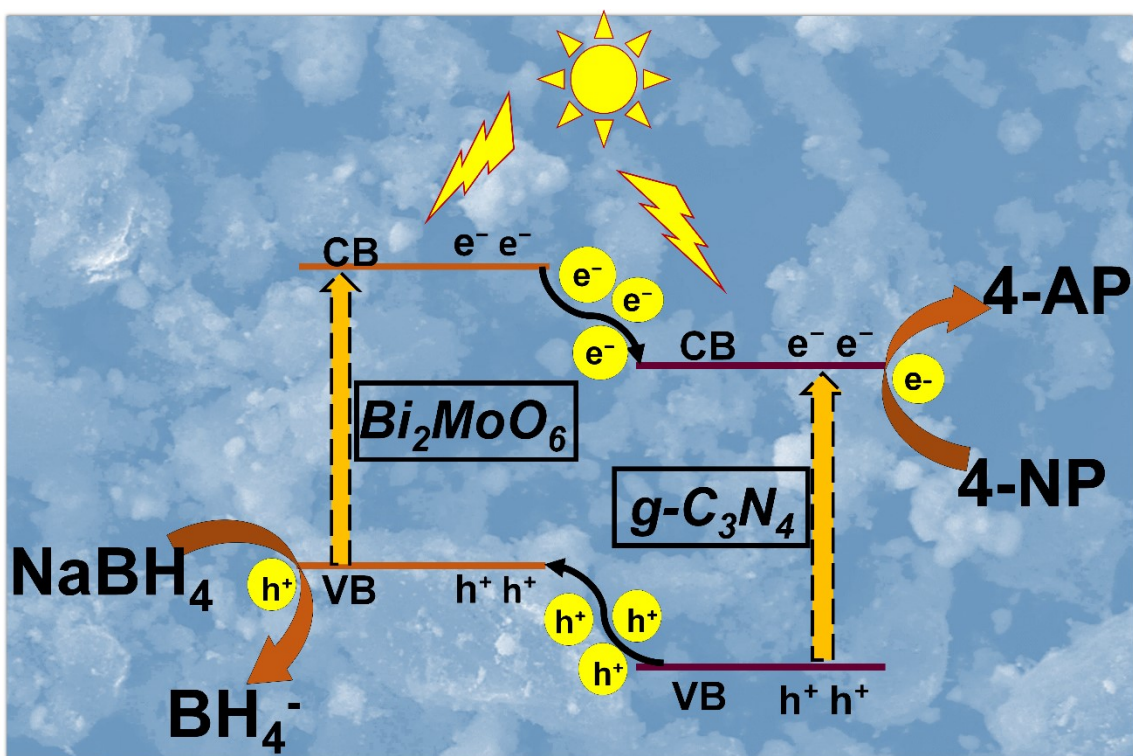

**Figure S8.** Schematic band diagram showing the photocatalytic charge transfer mechanism of the  $\text{Bi}_2\text{MoO}_6/\text{g-C}_3\text{N}_4$  nanocomposite.
